# Supplementary material for: Turbidity interferes with foraging success of visual but not chemosensory predators
Source: PeerJ journal article supplement (doi:10.7717/peerj.1212), 2015-09-08
Supplement: 07-07_Lee_Smee_Approval.pdf [file 07-07_Lee_Smee_Approval.pdf]

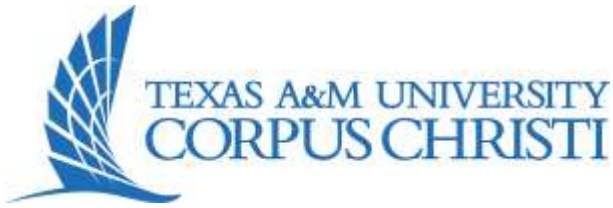

ERIN L. SHERMAN, MAcc, CRA, CIP, CPIA  
Research Compliance Officer  
Division of Research, Commercialization and Outreach

6300 OCEAN DRIVE, UNIT 5844  
CORPUS CHRISTI, TEXAS 78412  
O 361.825.2497 • F 361.825.2755

---

Institutional Animal Care and Use Committee (IACUC)

---

APPROVAL DATE: February 8, 2013  
TO: Dr. Lee Smee  
CC:  
FROM: Institutional Animal Care and Use Committee (IACUC)  
Office of Research Compliance  
SUBJECT: Initial Approval

---

Protocol Number: 07-07  
Title: Various invertebrate experiments  
Review Category: Invertebrate

---

This research project has been approved. As principal investigator, you assume the following responsibilities:

1. If animals are housed on campus, a copy of this approval letter should be kept in the lab notebook the IACUC will review during its semiannual facility inspections.
  2. Amendments: Changes to the protocol must be requested by submitting an Amendment Application to the Research Compliance Office for review. The Amendment must be approved before being implemented.
  3. Completion Report: Upon completion of the research project (including data analysis and final written papers), a Completion Report must be submitted to the Research Compliance Office.
  4. Records Retention: Records must be retained for three years beyond the completion date of the study.
- 

---

Provisions:

Comments: The IACUC voted to modify invertebrate procedures. Invertebrate animal use protocols will no longer have an expiration date. Please submit an amendment if any changes are proposed to the protocol. Please submit a completion report at the conclusion of the study.

---
