# Supplementary material for: Turbidity interferes with foraging success of visual but not chemosensory predators
Source: PeerJ. 2015 Sep 8;3:e1212. doi: 10.7717/peerj.1212 (PMC4579029; doi:10.7717/peerj.1212)
Supplement: Supplemental Information 2 [file peerj-03-1212-s002.xlsx]

## Sheet: Metadata
Mesocosm set up
68 Liter rubbermaid totes
Aqueon aquarium filters
Circulation pump
16 totes-2 of each treatment each week, haphazardly assigned
Trial
3 days
8 mud crabs 10-15 mm carapace width
Treatment
Turbid	1 cup ground kitty litter
Clear	No kitty Litter
Fish	2 pinfish
Crab	2 blue crabs
Mix	1 pinfish and 1 crab
Control	No predator
Combined	predator and turbidity treatment combined for a 1-way ANOVA
Feeding Assay MC
Mud crabs	8/tank
No substrate
Meso Oysters
10 juvenile spat settled onto a large shell
4 mud crabs to eat the oysters, preyed on by predator treatment
2.5 liters of sunbleached oyster shell
Meso MC
See Above
Number of the mud crabs eaten by predators
Meso Shrimp
Shrimp	4/tank
No Substrate

## Sheet: Shrimp
Week	Combined	Turbidity	Predator	Live	Dead	Eaten
2	CC	Clear	Control	4	0	0
4	CC	Clear	Control	3	1	0
1	CC	Clear	Control	2	2	0
3	CC	Clear	Control	3	1	0
2	CC	Clear	Control	2	2	0
3	CC	Clear	Control	3	1	0
3	CC	Clear	Control	1	3	0
4	CC	Clear	Control	3	1	0
4	CT	Turbid	Control	2	2	0
4	CT	Turbid	Control	3	1	0
4	CT	Turbid	Control	2	2	0
4	CT	Turbid	Control	3	1	0
4	CT	Turbid	Control	3	1	0
1	CT	Turbid	Control	1	3	0
1	BC	Clear	Crab	0	0	4
1	BC	Clear	Crab	0	0	4
2	BC	Clear	Crab	0	0	4
2	BC	Clear	Crab	0	0	4
1	BC	Clear	Crab	0	0	4
1	BT	Turbid	Crab	0	0	4
1	BT	Turbid	Crab	0	0	4
2	BT	Turbid	Crab	1	0	3
2	BT	Turbid	Crab	0	0	4
2	BT	Turbid	Crab	0	0	4
2	FC	Clear	Fish	0	1	3
4	FC	Clear	Fish	0	1	3
3	FC	Clear	Fish	1	2	1
3	FC	Clear	Fish	2	1	1
3	FC	Clear	Fish	2	2	0
3	FC	Clear	Fish	2	2	0
3	FC	Clear	Fish	2	2	0
3	FC	Clear	Fish	2	1	1
3	FC	Clear	Fish	3	1	0
3	FC	Clear	Fish	3	0	1
3	FC	Clear	Fish	2	0	2
4	FC	Clear	Fish	3	1	0
2	FT	Turbid	Fish	3	1	0
3	FT	Turbid	Fish	0	3	1
3	FT	Turbid	Fish	2	2	0
4	FT	Turbid	Fish	3	1	0
4	FT	Turbid	Fish	1	3	0
4	FT	Turbid	Fish	4	0	0
4	FT	Turbid	Fish	3	1	0
4	FT	Turbid	Fish	4	0	0
4	FT	Turbid	Fish	2	2	0
2	FT	Turbid	Fish	4	0	0
1	FT	Turbid	Fish	4	0	0
1	FT	Turbid	Fish	3	1	0
1	MC	Clear	Mix	0	0	4
1	MC	Clear	Mix	0	0	4
2	MC	Clear	Mix	0	0	4
2	MC	Clear	Mix	0	0	4
1	MC	Clear	Mix	0	0	4
2	MC	Clear	Mix	0	0	4
2	MC	Clear	Mix	0	0	4
2	MC	Clear	Mix	0	0	4
1	MC	Clear	Mix	0	0	4
3	MT	Turbid	Mix	2	0	2
3	MT	Turbid	Mix	0	0	4
3	MT	Turbid	Mix	0	0	4
4	MT	Turbid	Mix	0	0	4
3	MT	Turbid	Mix	0	0	4
3	MT	Turbid	Mix	1	0	3
3	MT	Turbid	Mix	0	0	4
4	MT	Turbid	Mix	0	2	2

## Sheet: Mud Crab
Week	Tank	Combined	Treatment	Turbidity	Alive	Dead	Eaten
1	11	BC	Blu	Clear	0	0	8
1	12	BC	Blu	Clear	0	0	8
1	14	BC	Blu	Clear	0	0	8
2	15	BC	Blu	Clear	0	0	8
2	16	BC	Blu	Clear	0	0	8
3	9	BC	Blu	Clear	0	0	8
1	4	BT	Blu	Turbid	0	0	8
1	15	BT	Blu	Turbid	4	0	4
2	4	BT	Blu	Turbid	0	0	8
2	7	BT	Blu	Turbid	0	0	8
2	8	BT	Blu	Turbid	0	0	8
3	5	BT	Blu	Turbid	0	0	8
3	12	BT	Blu	Turbid	1	0	7
1	3	CC	Con	Clear	8	0	0
2	1	CC	Con	Clear	8	0	0
3	1	CC	Con	Clear	7	0	0
1	5	CT	Con	Turbid	7	1	0
2	10	CT	Con	Turbid	8	0	0
3	8	CT	Con	Turbid	8	0	0
1	1	MC	Mix	Clear	0	0	8
1	6	MC	Mix	Clear	1	0	7
1	13	MC	Mix	Clear	0	0	8
2	5	MC	Mix	Clear	0	0	8
2	11	MC	Mix	Clear	0	0	8
3	4	MC	Mix	Clear	1	0	7
3	11	MC	Mix	Clear	2	0	6
1	7	MT	Mix	Turbid	2	0	6
1	9	MT	Mix	Turbid	2	0	6
2	2	MT	Mix	Turbid	0	0	8
2	14	MT	Mix	Turbid	0	0	8
3	7	MT	Mix	Turbid	4	0	4
3	14	MT	Mix	Turbid	1	0	7
1	10	FC	Pin	Clear	6	2	0
2	3	FC	Pin	Clear	8	0	0
2	9	FC	Pin	Clear	6	0	2
3	3	FC	Pin	Clear	7	0	1
3	10	FC	Pin	Clear	6	0	2
3	16	FC	Pin	Clear	6	0	2
1	2	FT	Pin	Turbid	4	0	4
1	8	FT	Pin	Turbid	7	0	1
2	6	FT	Pin	Turbid	8	0	0
2	12	FT	Pin	Turbid	8	0	0
3	6	FT	Pin	Turbid	8	0	0
3	13	FT	Pin	Turbid	8	0	0
6	1	FC	Pin	Clear	5	1	2
6	2	CT	Con	Turbid	5	3	0
6	3	FC	Pin	Clear	6	1	1
6	4	FT	Pin	Turbid	5	2	1
6	5	FC	Pin	Clear	4	3	1
6	6	FT	Pin	Turbid	7	0	1
6	7	FC	Pin	Clear	1	0	7
6	8	FT	Pin	Turbid	7	1	0
6	9	CC	Con	Clear	8	0	0
6	10	FT	Pin	Turbid	5	3	0
